# Supplementary material for: Total Knee Arthroplasty in Patients with Primary Sjögren’s Syndrome: A Retrospective Case-Control Study Matched Patients without Rheumatic Diseases
Source: MDPI journal article supplement (doi:10.3390/jcm11247438), 2022-12-15
Supplement: s1 [file s1]

Supplement Table S1. Characteristics of pSS patients

|                                            | Data       | Rate (%) |
|--------------------------------------------|------------|----------|
| Clinical characteristics                   |            |          |
| Age at diagnosis(years)                    | 55.87±7.81 | -        |
| PSS Duration(years)                        | 7.47±4.79  | -        |
| Lung involvement (Y/N)                     | 3/27       | 10.00    |
| Renal involvement (Y/N)                    | 2/28       | 6.67     |
| Digestive involvement (Y/N)                | 2/28       | 6.67     |
| Nervous system involvement (Y/N)           | 0/30       | 0        |
| Hematological involvement (Y/N)            | 10/20      | 33.33    |
| Autoimmune thyroid disease (Y/N)           | 1/29       | 3.33     |
| Smoking (Y/N)                              | 1/29       | 3.33     |
| ESSPRI                                     | 6.38±1.71  | -        |
| Laboratory characteristics                 |            |          |
| Anti-SSA (+) (Y/N)                         | 13/11      | 54.17    |
| Anti-SSB (+) (Y/N)                         | 10/14      | 41.67    |
| ANA (+) (Y/N)                              | 22/5       | 81.48    |
| RF (+) (Y/N)                               | 15/12      | 55.56    |
| Low C3 (Y/N)                               | 9/18       | 33.33    |
| Low C4 (Y/N)                               | 8/19       | 29.63    |
| High IgG levels (Y/N)                      | 13/14      | 48.15    |
| Treatments characteristics                 |            |          |
| Glucocorticosteroids (Y/N)                 | 26/4       | 86.67    |
| Perioperative “stress-dose” steroids (Y/N) | 22/8       | 73.33    |
| Hydroxychloroquine (Y/N)                   | 21/9       | 70.00    |
| Total glucosides of paeony (Y/N)           | 19/11      | 63.33    |
| bDMARDs (Y/N)                              | 2/28       | 6.67     |

|                |      |      |
|----------------|------|------|
| tsDMARDs (Y/N) | 0/30 | 0.00 |
|----------------|------|------|

Abbreviations: ESSPRI= EULAR Sjogren's Syndrome Patient Reported Index; Low C3 =C3<0.73g/L; Low C4 =C4<0.1g/L; High IgG levels= IgG ≥17.00 g/L; bDMARDs= biological disease modifying anti-rheumatic drugs; tsDMARDs= target synthetic disease modifying anti-rheumatic drugs
